# Supplementary material for: A stereodivergent synthesis of β-hydroxy-α-methylene lactones via vinyl epoxides
Source: Royal Society of Chemistry journal article supplement (doi:10.1039/b802310g), 2008-01-01
Supplement: b802310g.pdf [file b802310g.pdf]

# A stereodivergent synthesis of $\beta$ -hydroxy- $\alpha$ -methylene lactone via vinyl epoxides

Marion Davoust,<sup>a</sup> Frédéric Cantagrel,<sup>a</sup> Patrick Metzner,<sup>\*a</sup> and Jean-François Brière<sup>\*a,b,c</sup>

<sup>a</sup> Laboratoire de Chimie Moléculaire et Thio-organique, ENSICAEN, Université de Caen, CNRS, 6 Boulevard du Maréchal Juin, 14050 Caen, France. Fax: +33 (0)231452885; Tel: +33 (0)23145285; E-mail: patrick.metzner@ensicaen.fr

<sup>b</sup> INSA de Rouen, IRCOF, rue Tesnière, 76131 Mont-Saint-Aignan, France. Fax: +33 (0)235522962; Tel: +33 (0)235522464; E-mail: jean-francois.briere@insa-rouen.fr

<sup>c</sup> CNRS, Université de Rouen, UMR 6014 COBRA, rue Tesnière, 76131 Mont-Saint-Aignan, France.

|                                                              |   |
|--------------------------------------------------------------|---|
| General informations .....                                   | 2 |
| <i>Optimisation of the lactonisation of epoxide 3a</i> ..... | 3 |
| <i>NOE experiments carried out on lactone 4a</i> .....       | 4 |
| <i>NOE experience carried out on lactone 4g</i> .....        | 5 |
| <i>NOE experience carried out on carbonate 11a</i> .....     | 6 |
| <i>NMR of the sulfonium salt 8</i> .....                     | 7 |

## General informations

**NMR spectra** were recorded on a Bruker DPX 250 ( $^1\text{H}$ : 250 MHz,  $^{13}\text{C}$ : 63 MHz) or on a Bruker DRX 400 ( $^1\text{H}$ : 400 MHz,  $^{13}\text{C}$ : 100 MHz) instruments in  $\text{CDCl}_3$  unless indicated otherwise. Data appear in the following order: chemical shift  $\delta$  in ppm, multiplicity (s singlet, d doublet, t triplet, m multiplet), number of protons, coupling constant  $J$  in Hz. TMS is the internal standard for the  $\text{CDCl}_3$  solutions.

**IR spectra** were recorded on a Perkin-Elmer Spectrum-One ATR spectrophotometer. Vibrations  $\nu$  were reported in  $\text{cm}^{-1}$ .

**Mass spectra** were recorded on a Varian GC/MS/MS instrument equipped with CP 3800 (GC) and Saturn 2000 (MS/MS) modules.

**Exact mass spectra** were recorded on a Waters Q-TOF Micro apparatus (LC/MS) with a Xterra MS column.

**Purification** by flash<sup>1</sup> chromatography of compounds was achieved with Merck 60 silica gel (40-63  $\mu\text{m}$ ).

**Thin layer chromatography** (TLC) was performed on silica gel 60 F<sub>254</sub> (1.1 mm, Merck) and the plates were visualised with UV light (254 nm), a potassium permanganate solution (1 g with 2 g of  $\text{K}_2\text{CO}_3$  in 200 mL of water) or a phosphomolybdic acid solution (1 g in 100 mL of *i*-PrOH).

All reagents and solvents are commercially available and used without further purification unless otherwise noted.

Dry solvents were obtained from a PURESOLV<sup>TM</sup> apparatus developed by Innovative Technology Inc. (<http://www.solventpurification.com>). Toluene,  $\text{CH}_2\text{Cl}_2$ , MeCN, THF and ether were passed through activated alumina columns under nitrogen pressure. Toluene was also treated by mean of a copper column to remove traces of oxygen. The content of water was measured with a Coulometer (Karl Fisher method). The system provided solvent with 5-15 ppm of water.

---

<sup>1</sup> Still W. C., Kahn M., Mitra A., *J. Org. Chem.*, **1978**, *43*, 2923.

## Optimisation of the lactonisation of epoxide 3a

Scheme 1

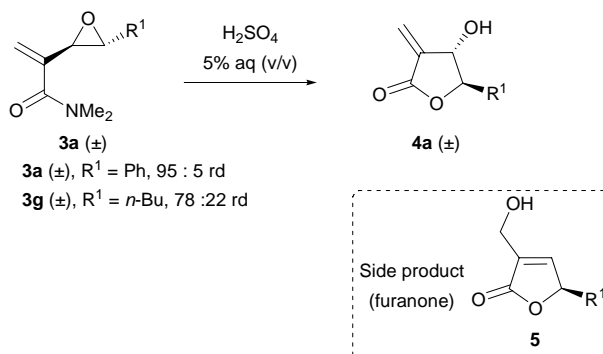

| R <sup>1</sup> | Acid                                     | Solvent                            | Temp (°C) | Time  | Conv <sup>a</sup> (%) | Yield <b>4</b> (%) | dr <sup>b</sup> ( <i>trans/cis</i> ) |
|----------------|------------------------------------------|------------------------------------|-----------|-------|-----------------------|--------------------|--------------------------------------|
| Ph             | H <sub>2</sub> SO <sub>4</sub> 6M (cat.) | THF                                | rt        | 21 h  | 100                   | 15 <sup>c</sup>    | 92:8                                 |
| Ph             | H <sub>2</sub> SO <sub>4</sub> 5% aq     | H <sub>2</sub> O                   | 60        | 0,5 h | 100                   | 13                 | 64:36                                |
| Ph             | HCl 2M                                   | H <sub>2</sub> O                   | 60        | 1,5 h | 100                   | 14 <sup>c</sup>    | 52:48                                |
| Ph             | BF <sub>3</sub> .Et <sub>2</sub> O       | THF                                | 0 to rt   | 3 h   | 100                   | 0                  | -                                    |
| Ph             | Bi(OTf) <sub>2</sub> (5 mol%)            | MeCN/H <sub>2</sub> O <sup>d</sup> | rt à 80   | 1 d   | 0                     | -                  | -                                    |
| Ph             | TFA, H <sub>2</sub> O                    | THF                                | 0 à rt    | 2 d   | 100                   | traces             | 100:0                                |
| Ph             | APTS.H <sub>2</sub> O                    | MeCN                               | Rt to 80  | 22 h  | 100                   | 0                  | -                                    |
| Ph             | HClO <sub>4</sub>                        | H <sub>2</sub> O/THF               | rt        | 1 d   | 8                     | -                  | -                                    |
| Ph             | HClO <sub>4</sub>                        | H <sub>2</sub> O/THF               | 40        | 3 d   | 0                     | -                  | -                                    |
| Ph             | Tartaric acid                            | H <sub>2</sub> O/THF               | rt        | 1 d   | 100                   | -                  | 93:7                                 |
| <i>n</i> -Bu   | H <sub>2</sub> SO <sub>4</sub> 10% aq    | H <sub>2</sub> O                   | 60        | 6,5 h | 100                   | 30                 | 76:24                                |
| <i>n</i> -Bu   | H <sub>2</sub> SO <sub>4</sub> 10% aq    | H <sub>2</sub> O                   | 60        | 0,7 h | 100                   | 66                 | 78:22 <sup>e</sup>                   |
| <i>n</i> -Bu   | H <sub>2</sub> SO <sub>4</sub> 5% aq     | H <sub>2</sub> O                   | 60        | 0,3 h | 100                   | 62                 | 79:21 <sup>f</sup>                   |

<sup>a</sup> With respect to the epoxide. <sup>b</sup> Determined on the NMR of the crude product. <sup>c</sup> Traces of furanone **5**. <sup>d</sup> MeCN/H<sub>2</sub>O (10:1). <sup>e</sup> 86:14 (**4:5**). <sup>f</sup> 90:10 (**4:5**).

## NOE experiments carried out on lactone 4a

**NOE 1D selective:** determination of the relative configuration *trans/cis*.

| lactone      | irradiated H   | H <sub>a</sub> -H <sub>b</sub> <sup>a</sup> | H-OH <sup>a</sup> | H-Ph <sup>a</sup> | H-CH <sub>2</sub> <sup>a</sup> |
|--------------|----------------|---------------------------------------------|-------------------|-------------------|--------------------------------|
| <i>trans</i> | H <sub>a</sub> | 1.2                                         | 0.8               | 1.1               | 0.1 + 0.4                      |
|              | H <sub>b</sub> | 0.9                                         | 0.5               | 1.8               | -                              |
| <i>cis</i>   | H <sub>a</sub> | 1.4                                         | 0.5               | 0.1               | ε + 0.2                        |
|              | H <sub>b</sub> | 1.5                                         | 0.2               | 1.7               | -                              |

<sup>a</sup> Correlation values are obtained from NOE selective 1D spectra which have been normalized to the irradiated peak intensity, and are given in percentage (%).

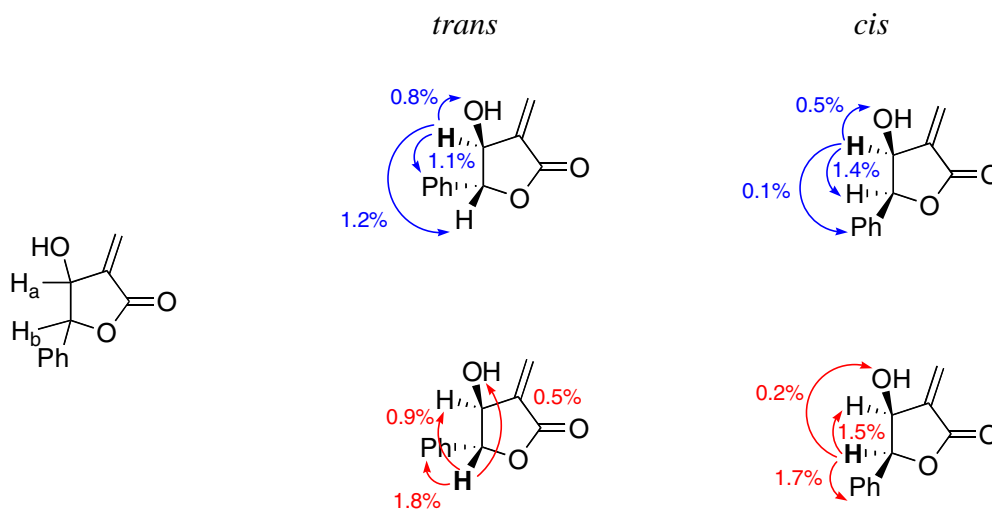

## NOE experience carried out on lactone 4g

**NOE 1D selective:** determination of the relative configuration *trans/cis*.

| lactone      | Irradiated H   | H <sub>a</sub> -H <sub>b</sub> <sup>a</sup> | H-OH <sup>a</sup> | H-( <i>n</i> -Bu) <sup>a</sup> | H-CH <sub>2</sub> <sup>a</sup> |
|--------------|----------------|---------------------------------------------|-------------------|--------------------------------|--------------------------------|
| <i>trans</i> | H <sub>a</sub> | 1.3                                         | 1.1               | 4.6                            | 0.1 + 0.7                      |
|              | H <sub>b</sub> | 1.1                                         | 0.7               | 5.3                            | -                              |
| <i>cis</i>   | H <sub>a</sub> | 2.2                                         | 1                 | 1.8                            | 0.1 + 0.8                      |
|              | H <sub>b</sub> | 2.2                                         | 0.1               | 4.3                            | -                              |

<sup>a</sup> Correlation values are obtained from NOE selective 1D spectra which have been normalized to the irradiated peak intensity, and are given in percentage (%).

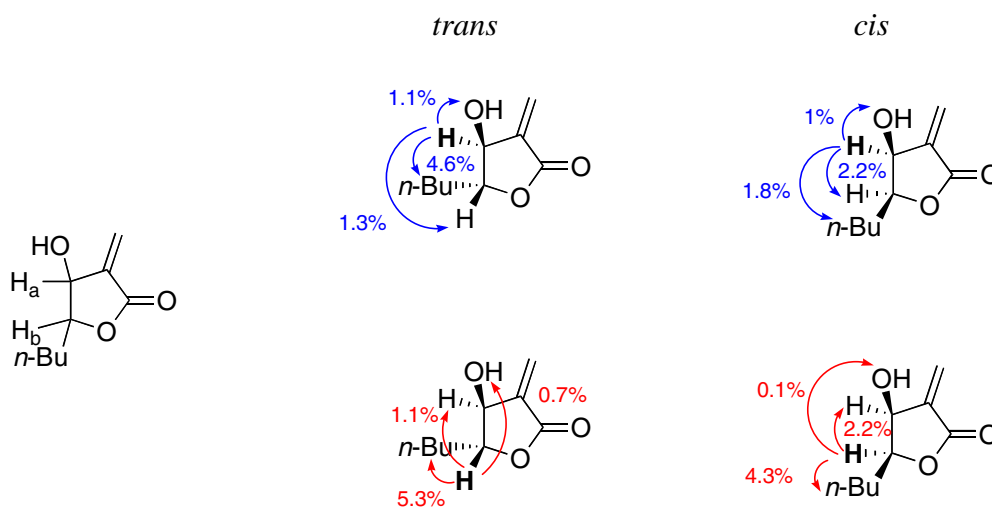

## NOE experience carried out on carbonate 11a

NOE 1D selective: determination of the relative configuration *trans/cis*.

| carbonate    | irradiated H   | H <sub>a</sub> -H <sub>b</sub> <sup>a</sup> | H-Ph <sup>a</sup> |
|--------------|----------------|---------------------------------------------|-------------------|
| <i>trans</i> | H <sub>a</sub> | 1.8                                         | 1                 |
|              | H <sub>b</sub> | 1.2                                         | 1.4               |
| <i>cis</i>   | H <sub>a</sub> | 5.7                                         | 0.3               |
|              | H <sub>b</sub> | 5.8                                         | 1.7               |

<sup>a</sup> Correlation values are obtained from NOE selective 1D spectra which have been normalized to the irradiated peak intensity, and are given in percentage (%).

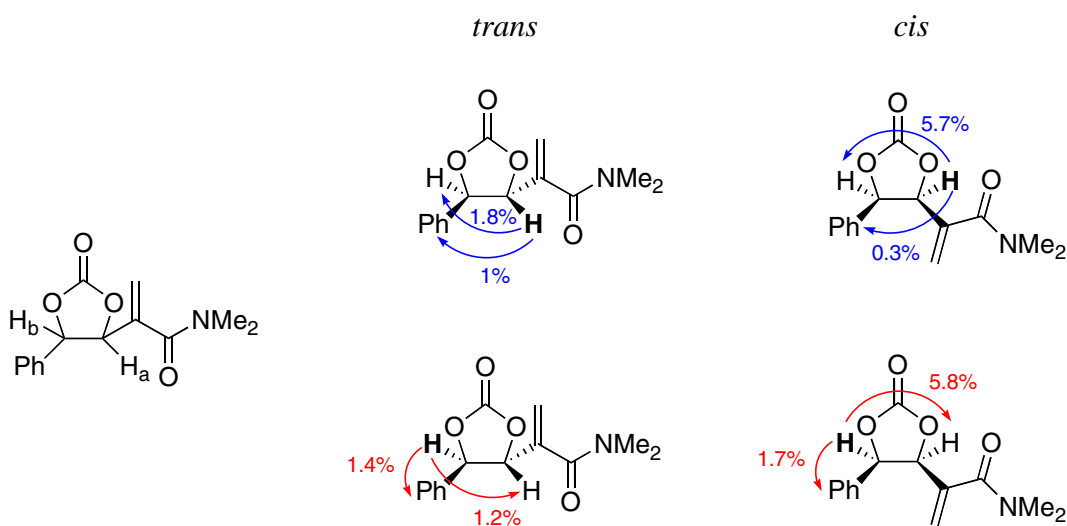

## NMR of the sulfonium salt **8**<sup>2</sup>

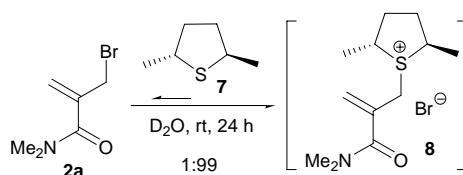

In a NMR tube, a heterogeneous mixture of allylic bromide **2a** (62 mg, 0.32 mmol) and thiolane **7** (29 mg, 0.25 mmol) in D<sub>2</sub>O (50  $\mu$ L) were stirred for 24 hours at room temperature. CD<sub>3</sub>CN (450  $\mu$ L) was added to the resulting homogeneous solution (corresponding to the soluble sulfonium salt **8**) and the mixture was immediately analyzed by NMR. A virtually complete formation of the sulfonium salt with respect to the sulfide **7** was observed by <sup>1</sup>H NMR.

$\delta_{\text{H}}$ (400 MHz): 6.03 (s, 1H, =CH<sub>2</sub>), 5.63 (s, 1H, =CH<sub>2</sub>), 4.25-4.16 (m, 1H, CH), 4.08-3.97 (m, 3H, CH and SCH<sub>2</sub>), 3.05 (s, 3H, NMe<sub>2</sub>), 2.90 (s, 3H, NMe<sub>2</sub>), 2.52-2.49 (m, 1H, CH<sub>2</sub>), 2.48-2.41 (m, 1H, CH<sub>2</sub>), 2.23-2.12 (m, 1H, CH<sub>2</sub>), 1.90-1.78 (m, 1H, CH<sub>2</sub>), 1.54 (d,  $J = 7.0$  Hz, 3H, Me), 1.51 (d,  $J = 7.0$  Hz, 3H, Me).

---

<sup>2</sup> For the use and comments in ylide promoted epoxidation by a pre-formed sulfonium salt in water, see: V. Schulz, M. Davoust, M. Lemarié, J.-F. Lohier, J. Sopkova de Oliveira Santos, P. Metzner and J.-F. Brière, *Org. Lett.*, 2007, **9**, 1745.
